# Supplementary material for: Use of Environmental DNA to Determine Fantail Darter (Etheostoma flabellare) Density in a Laboratory Setting: Effects of Biomass and Filtration Method
Source: Hindawi journal article supplement (doi:10.1155/2020/4731686), 2020-06-17
Supplement: f1 [file 4731686.f1.docx]

**Appendix A**

Table 1. Non-diluted eDNA concentrations for non-diluted samples. These data were not used in the publication because they appear to be inhibited relative to 1:20 diluted samples.

| **Single filter** | | **Combined filters** | |
| --- | --- | --- | --- |
| **Darter biomass**  **(g/l)** | **eDNA conc.**  **(μg/l)** | **Darter biomass**  **(g/l)** | **eDNA conc.**  **(μg/l)** |
| **0.3** | **1.15** | **0.3** | **1.67** |
| **0.3** | **2.09** | **0.3** | **1.69** |
| **0.3** | **1.95** | **0.3** | **1.59** |
| **0.3** | **2.15** | **0.3** | **1.80** |
| **0.6** | **2.52** | **0.6** | **2.61** |
| **0.6** | **2.85** | **0.6** | **1.69** |
| **0.6** | **2.00** | **0.6** | **1.95** |
| **0.6** | **2.65** | **0.6** | **2.08** |
| **1.2** | **3.07** | **1.2** | **2.24** |
| **1.2** | **2.64** | **1.2** | **2.80** |
| **1.2** | **1.94** | **1.2** | **1.92** |
| **1.2** | **3.36** | **1.2** | **2.55** |
| **2.4** | **2.46** | **2.4** | **2.76** |
| **2.4** | **2.29** | **2.4** | **2.97** |
| **2.4** | **2.57** | **2.4** | **2.45** |
| **2.4** | **3.06** | **2.4** | **1.87** |

Table 2. eDNA concentrations for samples diluted 1:20 following DNA extraction. These data were used in the publication.

| **Single filter** | | **Combined filters** | |
| --- | --- | --- | --- |
| **Darter biomass**  **(g/l)** | **eDNA conc.**  **(μg/l)** | **Darter biomass**  **(g/l)** | **eDNA conc.**  **(μg/l)** |
| **0.3** | 13.92 | **0.3** | 7.80 |
| **0.3** | 12.72 | **0.3** | 18.82 |
| **0.3** | 26.83 | **0.3** | 22.38 |
| **0.3** | 28.17 | **0.3** | 16.70 |
| **0.6** |  | **0.6** | 12.47 |
| **0.6** | 35.08 | **0.6** | 19.95 |
| **0.6** | 20.21 | **0.6** | 20.27 |
| **0.6** | 36.55 | **0.6** | 31.76 |
| **1.2** | 11.93 | **1.2** |  |
| **1.2** | 49.48 | **1.2** | 37.16 |
| **1.2** | 32.64 | **1.2** | 7.10 |
| **1.2** |  | **1.2** | 24.74 |
| **2.4** | 16.98 | **2.4** | 15.00 |
| **2.4** | 34.98 | **2.4** | 31.17 |
| **2.4** | 32.43 | **2.4** | 40.64 |
| **2.4** | 39.47 | **2.4** | 44.64 |

**A**

**B**

Figure 1. eDNA concentrations at various biomass levels for single filter method (A) (p=0.031) and multiple filter method (B) (p=0.002) for non-diluted samples. These data were not used in the paper because they appear to be inhibited relative to 1:20 diluted samples.

Table 3. CT values for non-diluted samples. These data were not used in the paper because they appear to be inhibited relative to 1:20 diluted samples.

| **Filter method** | **Biomass (g/l)** | **Tank #** |  | **Cт value** |  | **Mean** | **S.D.** |
| --- | --- | --- | --- | --- | --- | --- | --- |
| Single | 0.3 | T1 | 31.2553496 | 32.12 | 32.19 | 31.9 | 0.52 |
| Single | 0.3 | T2 | 28.27275069 | 28.95 | 29.02 | 28.7 | 0.41 |
| Single | 0.3 | T3 | 28.97790187 | 29.44 | 29.49 | 29.3 | 0.28 |
| Single | 0.3 | T4 | 28.48239023 | 28.84 | 28.7 | 28.7 | 0.18 |
| Single | 0.6 | T1 | 27.00538438 | 27.48 | 27.56 | 27.3 | 0.30 |
| Single | 0.6 | T2 | 25.76660528 | 26.3 | 26.5 | 26.2 | 0.38 |
| Single | 0.6 | T3 | 28.55862279 | 29.19 | 29.41 | 29.1 | 0.44 |
| Single | 0.6 | T4 | 26.56704716 | 27.02 | 27.12 | 26.9 | 0.29 |
| Single | 1.2 | T1 | 25.26156457 | 25.65 | 25.66 | 25.5 | 0.23 |
| Single | 1.2 | T2 | 26.40505297 | 27.06 | 27.17 | 26.9 | 0.41 |
| Single | 1.2 | T3 | 28.80637861 | 29.39 | 29.56 | 29.3 | 0.40 |
| Single | 1.2 | T4 | 24.19430873 | 24.66 | 24.68 | 24.5 | 0.27 |
| Single | 2.4 | T1 | 27.46277974 | 27.63 | 27.83 | 27.6 | 0.18 |
| Single | 2.4 | T2 | 27.75818091 | 28.31 | 28.31 | 28.1 | 0.32 |
| Single | 2.4 | T3 | 26.84339019 | 27.35 | 27.34 | 27.2 | 0.29 |
| Single | 2.4 | T4 | 25.29968085 | 25.66 | 25.74 | 25.6 | 0.23 |
| Multiple | 0.3 | T1 | 29.66399491 | 30.52 | 30.27 | 30.2 | 0.44 |
| Multiple | 0.3 | T2 | 28.27275069 | 30.31 | 30.35 | 29.6 | 1.19 |
| Multiple | 0.3 | T3 | 28.97790187 | 30.69 | 30.64 | 30.1 | 0.97 |
| Multiple | 0.3 | T4 | 29.28283211 | 29.93 | 30.03 | 29.7 | 0.41 |
| Multiple | 0.6 | T1 | 26.62422158 | 27.15 | 27.26 | 27.0 | 0.34 |
| Multiple | 0.6 | T2 | 29.61634956 | 30.37 | 30.29 | 30.1 | 0.41 |
| Multiple | 0.6 | T3 | 29.22565769 | 28.89 | 29.99 | 29.4 | 0.56 |
| Multiple | 0.6 | T4 | 28.28227976 | 28.93 | 29.11 | 28.8 | 0.44 |
| Multiple | 1.2 | T1 | 27.88205882 | 28.42 | 28.54 | 28.3 | 0.35 |
| Multiple | 1.2 | T2 | 26.00483203 | 26.52 | 26.64 | 26.4 | 0.34 |
| Multiple | 1.2 | T3 | 28.78732047 | 29.57 | 29.55 | 29.3 | 0.45 |
| Multiple | 1.2 | T4 | 26.91962275 | 27.4 | 27.44 | 27.3 | 0.29 |
| Multiple | 2.4 | T1 | 26.38599483 | 26.64 | 26.76 | 26.6 | 0.19 |
| Multiple | 2.4 | T2 | 25.69990179 | 26 | 26 | 25.9 | 0.17 |
| Multiple | 2.4 | T3 | 27.2531402 | 27.73 | 27.8 | 27.6 | 0.30 |
| Multiple | 2.4 | T4 | 29.30189025 | 29.58 | 29.87 | 29.6 | 0.28 |

Table 4. CT values for samples following a 1:20 dilution of extracted DNA. These data were used in the publication.

| **Filter method** | **Biomass (g/l)** | **Tank #** |  | **Cт value** |  | **Mean** | **S.D.** |
| --- | --- | --- | --- | --- | --- | --- | --- |
| Multiple | 0.3 | 2 | 39.1 | 37.6 | 37.2 | 38.0 | 1.04 |
| Multiple | 0.3 | 3 | 36.5 | 36.9 | 37.5 | 37.0 | 0.48 |
| Multiple | 0.3 | 4 |  | 37.6 | 37.5 | 37.6 | 0.09 |
| Multiple | 0.3 | 5 | 40.4 | 38.8 | 39.3 | 39.5 | 0.84 |
| Multiple | 0.6 | 1 | 34.5 | 35.0 | 36.5 | 35.3 | 1.03 |
| Multiple | 0.6 | 3 | 37.2 | 37.7 | 37.1 | 37.3 | 0.30 |
| Multiple | 0.6 | 4 | 37.8 | 36.5 | 37.8 | 37.4 | 0.78 |
| Multiple | 0.6 | 5 | 38.8 | 38.4 | 38.9 | 38.7 | 0.28 |
| Multiple | 1.2 | 2 | 37.1 | 36.0 |  | 36.6 | 0.84 |
| Multiple | 1.2 | 4 | 29.4 | 39.4 |  | 34.4 | 7.06 |
| Multiple | 1.2 | 5 | 39.4 | 39.9 |  | 39.6 | 0.36 |
| Multiple | 2.4 | 1 | 28.9 | 33.1 |  | 33.1 | 2.94 |
| Multiple | 2.4 | 2 | 32.3 | 35.2 |  | 33.8 | 2.05 |
| Multiple | 2.4 | 3 | 37.7 | 38.8 | 40.3 | 38.3 | 1.32 |
| Multiple | 2.4 | 4 | 35.4 | 35.5 |  | 35.4 | 0.10 |
| Single | 0.3 | 2 | 38.5 | 39.3 | 38.4 | 38.4 | 0.50 |
| Single | 0.3 | 3 | 36.0 | 37.9 | 39.4 | 38.6 | 1.70 |
| Single | 0.3 | 4 | 36.2 | 38.3 | 36.2 | 36.2 | 1.24 |
| Single | 0.3 | 5 |  | 36.0 | 36.0 | 36.0 | 0.00 |
| Single | 0.6 | 1 | 46.9 | 38.7 |  | 38.7 | 5.79 |
| Single | 0.6 | 3 | 34.7 | 35.1 | 34.5 | 34.8 | 0.31 |
| Single | 0.6 | 4 | 36.7 | 38.0 | 35.0 | 37.3 | 1.49 |
| Single | 0.6 | 5 | 34.8 | 34.2 |  | 34.5 | 0.44 |
| Single | 1.2 | 2 | 39.0 | 40.6 | 38.6 | 38.8 | 1.09 |
| Single | 1.2 | 4 | 32.8 | 31.7 |  | 32.2 | 0.75 |
| Single | 1.2 | 5 | 35.1 | 44.9 | 35.2 | 35.2 | 5.63 |
| Single | 2.4 | 1 | 36.8 | 38.6 | 38.3 | 38.5 | 0.97 |
| Single | 2.4 | 2 | 34.8 | 34.7 | 34.7 | 34.8 | 0.05 |
| Single | 2.4 | 3 | 35.1 | 34.4 | 35.3 | 35.2 | 0.48 |
| Single | 2.4 | 4 | 33.9 | 34.1 |  | 34.0 | 0.16 |
